# Supplementary material for: “Navigating Healthcare and Social Interactions: The Impact of Multidrug-Resistant Bacteria on Wound Patients”– a qualitative study
Source: Research Square preprint supplement (doi:10.21203/rs.3.rs-7486214/v1), 2025-10-27
Supplement: Supplementary file 1 [file 2671ed265d02fedac9b3e9ec.pdf]

## **Interview guide**

### **Background Questions:**

- Gender?
- Age?
- Multidrug-resistant bacteria?
- How long ago was the diagnosis?

### **Can you start by telling me how it happened when you received the news that you had been infected with a multidrug-resistant bacterium?**

- When?
- How? Phone call/personal meeting/information letter
- Who informed you?
- What did you feel?

### **Has your everyday life changed in any way since you received the news that you had been infected with a multidrug-resistant bacterium?**

- If yes, can you describe how?
- Do you have more examples of that?
- How do you feel about it?

### **Have you told anyone, for example relatives, about your carrier status of multidrug-resistant bacteria?**

- If yes, what reactions have you received?
- If no, would you like to share why you haven't told anyone?
- Is there anyone you don't want to tell? Why not?

### **When you visit healthcare services or, for example, go to the dentist, do you tell them that you are a carrier of a multidrug-resistant bacterium?**

- If yes, how do you tell them and how do you feel about it? How has it made you feel?
- If no, why not?

### **Anything you would like to add?**
